# Supplementary material for: Cr(vi), Pb(ii), Cd(ii) adsorption properties of nanostructured BiOBr microspheres and their application in a continuous filtering removal device for heavy metal ions
Source: Royal Society of Chemistry journal article supplement (doi:10.1039/c3ta14519k), 2013-11-29
Supplement: c3ta14519k.pdf [file c3ta14519k.pdf]

# **Cr (VI), Pb (II), Cd (II) adsorption property of nanostructured BiOBr microsphere and its application in continuous filtering removal device for heavy metal ions**

Xingqi Wang,<sup>a</sup> Wenxia Liu,<sup>a\*</sup> JianTian,<sup>b</sup> Zhenhuan Zhao,<sup>b</sup> Pin Hao,<sup>b</sup> Xueliang Kang,<sup>b</sup> Yuanhua Sang,<sup>b</sup> and Hong Liu<sup>b\*</sup>

<sup>a</sup> Shandong Provincial Key Laboratory of Fine Chemicals, Key Laboratory of Pulp & Paper Science and Technology ( Shandong Polytechnic University), Ministry of Education, Jinan, Shandong 250353, China

<sup>b</sup> State Key Laboratory of Crystal Materials, Shandong University, Jinan, Shandong 250100, China

\*Corresponding Author. E-mail: [liuwenxia@qlu.edu.cn](mailto:liuwenxia@qlu.edu.cn); [hongliu@sdu.edu.cn](mailto:hongliu@sdu.edu.cn)

1. Standard curve of Cr (VI) concentration vs. absorbance.

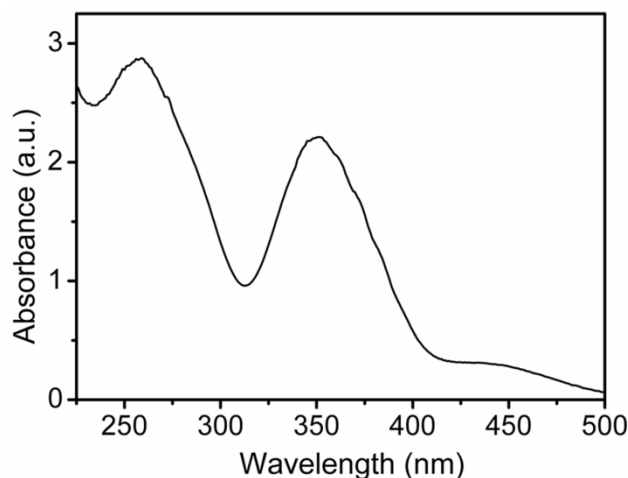

Figure S1. UV-visible spectrum of  $K_2Cr_2O_7$  aqueous solution.

Figure S1 shows the UV-Visible spectrum of Cr (VI) aqueous solution with a concentration of 35 mg/L. It can be seen that there is a characteristic absorption peak at 353nm. By testing the absorbance of Cr (VI) aqueous solution with different concentrations, a linear relationship between the concentration and the absorbance was established and is shown in Figure S2.

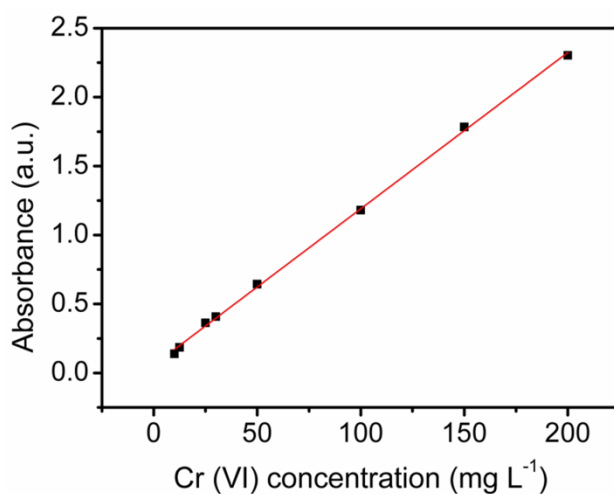

Figure S2. Absorbance of aqueous Cr (VI) solution as a function of aqueous Cr (VI) concentration.

## 2. XPS spectra of the as-prepared BiOBr microspheres

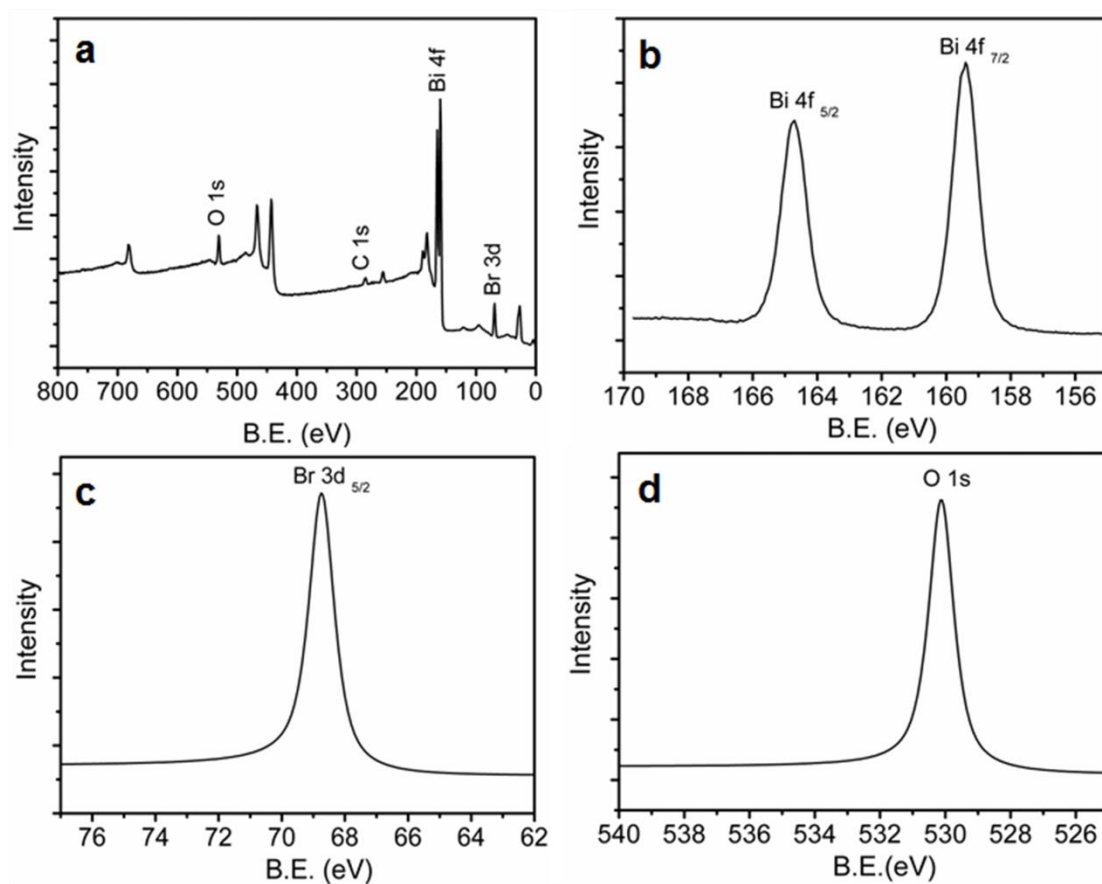

Figure S3. XPS spectra of the as-prepared BiOBr microspheres before adsorption of heavy metal ions.

### 3. Zeta potential of BiOBr nanostructures

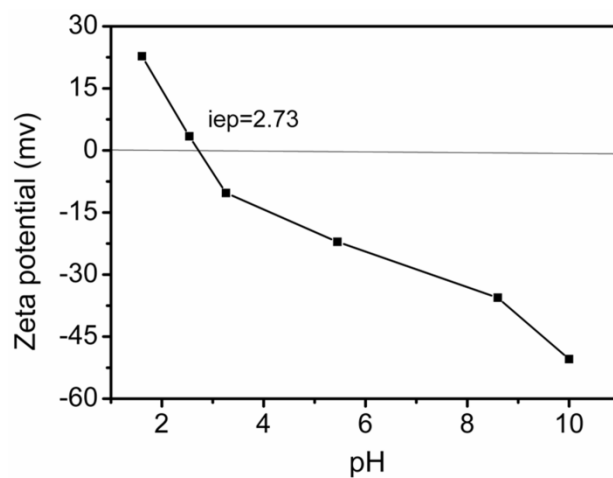

Figure S4. Zeta potential of BiOBr nanostructured microspheres with Bi to Br ratio of 1:5.

### 4. Cyclic utilization of the adsorbent

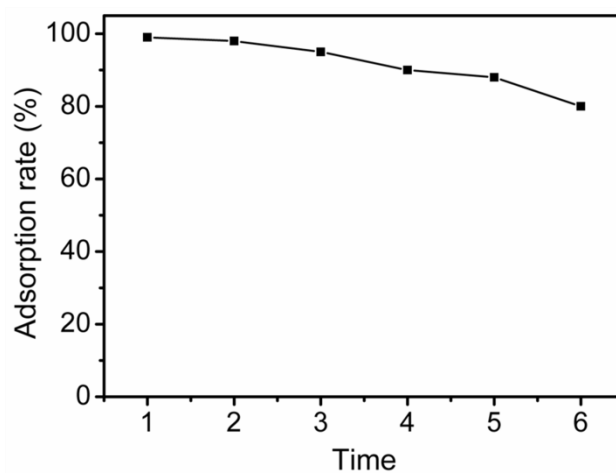

Figure S5. Cyclic utilization of the adsorbent for the adsorption of Cr (VI).

## 5. Adsorption of Pb (II) and Cd (II) ions

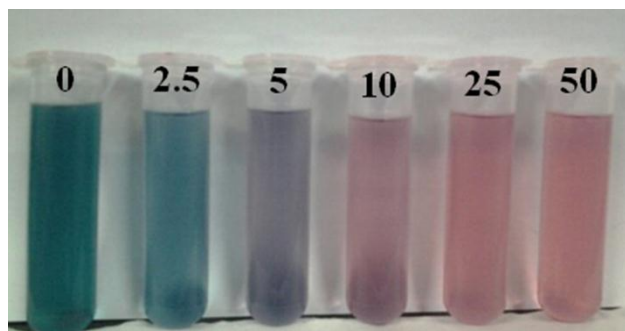

Figure S6. Appearance of dithizone and dithizone-Pb (II) complexes with different concentrations (mg/L) dissolved into chloroform.

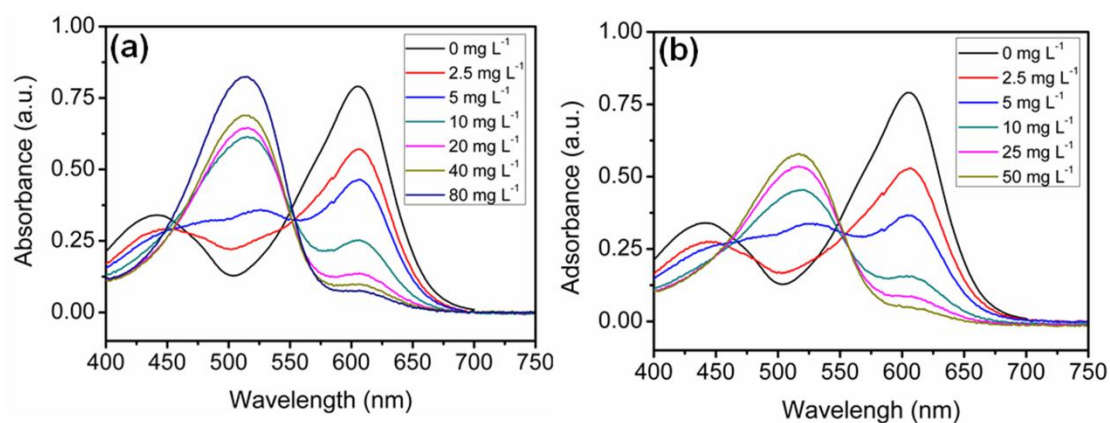

Figure S7. UV-Vis absorption spectra of different initial concentrations of (a) Cd (II) and (b) Pb (II) complexed with dithizone dissolved in chloroform.

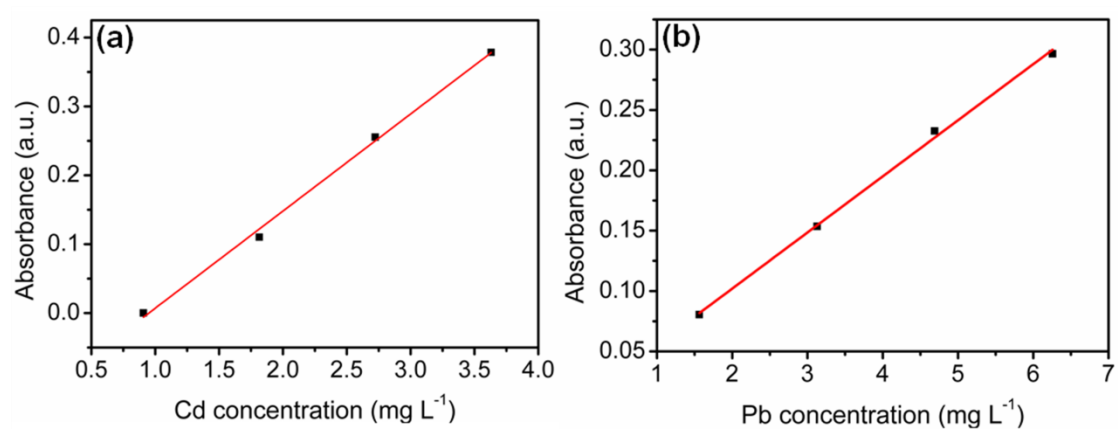

Figure S8. The relative absorbance of (a) Cd-dithizone and (b) Pb-dithizone complex after adsorption in chloroform as function of initial concentration of heavy metal ions. ( $R_a^2=0.997$ ,  $R_b^2=0.997$ )
